# Supplementary material for: Identification of Reference Proteins for Western Blot Analyses in Mouse Model Systems of 2,3,7,8-Tetrachlorodibenzo-P-Dioxin (TCDD) Toxicity
Source: PLoS One. 2014 Oct 17;9(10):e110730. doi: 10.1371/journal.pone.0110730 (PMC4201576; doi:10.1371/journal.pone.0110730)
Supplement: Table S6 — Animal Information. (XLS) [file pone.0110730.s010.xls]

## Sheet: Sheet1
Experiment	Animal	Strain	Genotype	Gender	Initial Body Weight (g)
S383	5	C57BL.6	WT	Female	22
S383	6	C57BL.6	WT	Female	22
S383	7	C57BL.6	WT	Female	20.8
S383	8	C57BL.6	WT	Female	20
S383	14	C57BL.6	WT	Female	20.7
S383	15	C57BL.6	WT	Female	20.3
S383	16	C57BL.6	WT	Female	20
S383	17	C57BL.6	WT	Female	22.5
S383	18	C57BL.6	WT	Female	20.8
S383	1	C57BL.6	WT	Male	28.1
S383	2	C57BL.6	WT	Male	25.5
S383	3	C57BL.6	WT	Male	25.5
S383	4	C57BL.6	WT	Male	26.1
S383	9	C57BL.6	WT	Male	25.5
S383	10	C57BL.6	WT	Male	26.9
S383	11	C57BL.6	WT	Male	24.2
S383	12	C57BL.6	WT	Male	25.6
S383	13	C57BL.6	WT	Male	25.4
S381	13	DBA.2J	Ala375Val	Male	26.4
S381	14	DBA.2J	Ala375Val	Male	26.7
S381	15	DBA.2J	Ala375Val	Male	19.9
S381	16	DBA.2J	Ala375Val	Male	21.7
S381	17	DBA.2J	Ala375Val	Male	27
S381	18	DBA.2J	Ala375Val	Male	25.6
S381	19	DBA.2J	Ala375Val	Male	22.2
S381	20	DBA.2J	Ala375Val	Male	22.7
S381	21	DBA.2J	Ala375Val	Male	27.4
S381	22	DBA.2J	Ala375Val	Male	26.1
S381	23	DBA.2J	Ala375Val	Male	21.5
S381	24	DBA.2J	Ala375Val	Male	22.1
S381	757	C57BL.6	rWT	Male	29
S381	763	C57BL.6	rWT	Male	33.9
S381	768	C57BL.6	rWT	Male	27.5
S381	775	C57BL.6	rWT	Male	26.9
S381	758	C57BL.6	rWT	Male	28
S381	762	C57BL.6	rWT	Male	32
S381	766	C57BL.6	rWT	Male	31.7
S381	773	C57BL.6	rWT	Male	21.1
S381	761	C57BL.6	rWT	Male	30.4
S381	765	C57BL.6	rWT	Male	29.4
S381	772	C57BL.6	rWT	Male	24.2
S381	776	C57BL.6	rWT	Male	27.5
S380	1	C57BL.6	WT	Female	22.3
S380	2	C57BL.6	WT	Female	21.2
S380	3	C57BL.6	WT	Female	18.3
S380	11	C57BL.6	WT	Female	20.1
S380	12	C57BL.6	WT	Female	24
S380	13	C57BL.6	WT	Female	21.7
S380	14	C57BL.6	WT	Female	21.1
S380	15	C57BL.6	WT	Female	21.4
S382	1	C57BL.6	WT	Male	25.6
S382	2	C57BL.6	WT	Male	29.5
S382	3	C57BL.6	WT	Male	30
S382	4	C57BL.6	WT	Male	28.4
S382	13	C57BL.6	WT	Male	30.8
S382	14	C57BL.6	WT	Male	29.1
S382	15	C57BL.6	WT	Male	29
S382	16	C57BL.6	WT	Male	29.6
S382	17	C57BL.6	WT	Male	30.5
S380	5	C57BL.6	WT	Female	20.3
S380	6	C57BL.6	WT	Female	21.9
S380	7	C57BL.6	WT	Female	21.2
S380	16	C57BL.6	WT	Female	17.3
S380	4	C57BL.6	WT	Female	19.8
S380	17	C57BL.6	WT	Female	17.8
S380	18	C57BL.6	WT	Female	21.5
S380	19	C57BL.6	WT	Female	21
S380	20	C57BL.6	WT	Female	18.9
S382	5	C57BL.6	WT	Male	28.9
S382	6	C57BL.6	WT	Male	31.3
S382	7	C57BL.6	WT	Male	28.3
S382	8	C57BL.6	WT	Male	27.7
S382	18	C57BL.6	WT	Male	30.9
S382	19	C57BL.6	WT	Male	28.2
S382	20	C57BL.6	WT	Male	27.4
S382	21	C57BL.6	WT	Male	27.2
S382	22	C57BL.6	WT	Male	31.2
S364	270	C57BL.6	DEL	Male	32.6
S364	280	C57BL.6	DEL	Male	28.7
S364	302	C57BL.6	DEL	Male	31.5
S364	304	C57BL.6	DEL	Male	28.7
S364	317	C57BL.6	DEL	Male	28.1
S364	271	C57BL.6	DEL	Male	32
S364	283	C57BL.6	DEL	Male	31.4
S364	293	C57BL.6	DEL	Male	33.5
S364	316	C57BL.6	DEL	Male	27.2
S364	276	C57BL.6	DEL	Male	31.5
S364	295	C57BL.6	DEL	Male	29.9
S364	301	C57BL.6	DEL	Male	32.3
S364	305	C57BL.6	DEL	Male	29.3
S364	274	C57BL.6	DEL	Male	33.8
S364	285	C57BL.6	DEL	Male	32.4
S364	300	C57BL.6	DEL	Male	28.7
S364	307	C57BL.6	DEL	Male	28
S364	275	C57BL.6	DEL	Male	34.1
S364	284	C57BL.6	DEL	Male	32.3
S364	292	C57BL.6	DEL	Male	30.7
S364	315	C57BL.6	DEL	Male	27.4
S364	372	C57BL.6	INS	Male	34
S364	385	C57BL.6	INS	Male	36.4
S364	410	C57BL.6	INS	Male	37.1
S364	417	C57BL.6	INS	Male	30.7
S364	447	C57BL.6	INS	Male	28.5
S364	380	C57BL.6	INS	Male	33.1
S364	396	C57BL.6	INS	Male	31.3
S364	414	C57BL.6	INS	Male	32.1
S364	425	C57BL.6	INS	Male	32.6
S364	389	C57BL.6	INS	Male	31.7
S364	411	C57BL.6	INS	Male	36.6
S364	415	C57BL.6	INS	Male	29.6
S364	433	C57BL.6	INS	Male	30.9
S364	390	C57BL.6	INS	Male	32.1
S364	408	C57BL.6	INS	Male	33
S364	416	C57BL.6	INS	Male	31
S364	419	C57BL.6	INS	Male	28.4
S364	373	C57BL.6	INS	Male	30.7
S364	402	C57BL.6	INS	Male	30.7
S364	418	C57BL.6	INS	Male	31
S364	426	C57BL.6	INS	Male	33.6
S364	434	C57BL.6	INS	Male	30.6
S364	528	C57BL.6	rWT	Male	37.9
S364	595	C57BL.6	rWT	Male	33.8
S364	612	C57BL.6	rWT	Male	30
S364	636	C57BL.6	rWT	Male	27.5
S364	642	C57BL.6	rWT	Male	26.4
S364	543	C57BL.6	rWT	Male	37.4
S364	564	C57BL.6	rWT	Male	31.3
S364	599	C57BL.6	rWT	Male	29.2
S364	635	C57BL.6	rWT	Male	26.7
S364	551	C57BL.6	rWT	Male	34.3
S364	562	C57BL.6	rWT	Male	30.3
S364	600	C57BL.6	rWT	Male	30.5
S364	627	C57BL.6	rWT	Male	32.6
S364	552	C57BL.6	rWT	Male	29.8
S364	563	C57BL.6	rWT	Male	31.3
S364	596	C57BL.6	rWT	Male	32.6
S364	625	C57BL.6	rWT	Male	32.2
S364	553	C57BL.6	rWT	Male	31.7
S364	597	C57BL.6	rWT	Male	30.4
S364	602	C57BL.6	rWT	Male	29.8
S386	1	C57BL.6	WT	Female	22.6
S386	2	C57BL.6	WT	Female	20.8
S386	3	C57BL.6	WT	Female	21.9
S386	4	C57BL.6	WT	Female	21.1
S386	5	C57BL.6	WT	Female	19
S386	6	C57BL.6	WT	Female	21.5
S386	7	C57BL.6	WT	Female	20.3
S386	8	C57BL.6	WT	Female	21.1
S386	9	C57BL.6	WT	Female	21
S386	10	C57BL.6	WT	Female	19.4
S386	11	C57BL.6	WT	Female	22.2
S386	12	C57BL.6	WT	Female	22.8
S386	13	C57BL.6	WT	Female	22.1
S386	15	C57BL.6	WT	Female	18.8
S386	16	C57BL.6	WT	Female	25.3
S386	17	C57BL.6	WT	Female	19.7
S386	18	C57BL.6	WT	Female	19.1
S386	19	C57BL.6	WT	Female	22
S386	20	C57BL.6	WT	Female	17.6
S386	21	C57BL.6	WT	Female	21.2
S386	22	C57BL.6	WT	Female	21.8
S386	23	C57BL.6	WT	Female	21.2
S386	24	C57BL.6	WT	Female	21.1
S386	25	C57BL.6	WT	Female	19.5
S374	1	C57BL.6	WT	Male	30
S374	2	C57BL.6	WT	Male	28.6
S374	3	C57BL.6	WT	Male	23.6
S374	4	C57BL.6	WT	Male	25.4
S374	5	C57BL.6	WT	Male	27.3
S374	6	C57BL.6	WT	Male	27.6
S374	7	C57BL.6	WT	Male	27.7
S374	8	C57BL.6	WT	Male	25.9
S374	9	C57BL.6	WT	Male	30.8
S374	10	C57BL.6	WT	Male	28.2
S374	11	C57BL.6	WT	Male	22.5
S374	12	C57BL.6	WT	Male	25.7
S374	13	C57BL.6	WT	Male	26.8
S374	14	C57BL.6	WT	Male	26.7
S374	15	C57BL.6	WT	Male	26
S374	16	C57BL.6	WT	Male	26.7
S374	17	C57BL.6	WT	Male	32.7
S374	18	C57BL.6	WT	Male	23.6
S374	19	C57BL.6	WT	Male	25.1
S374	20	C57BL.6	WT	Male	25.8
S380	8	C57BL.6	WT	Female	17.7
S380	9	C57BL.6	WT	Female	20.5
S380	10	C57BL.6	WT	Female	23.3
S380	21	C57BL.6	WT	Female	23.7
S380	22	C57BL.6	WT	Female	23.1
S380	23	C57BL.6	WT	Female	20.7
S380	24	C57BL.6	WT	Female	21
S380	25	C57BL.6	WT	Female	19.2
S382	9	C57BL.6	WT	Male	30.6
S382	10	C57BL.6	WT	Male	28.2
S382	11	C57BL.6	WT	Male	26.9
S382	12	C57BL.6	WT	Male	31.2
S382	23	C57BL.6	WT	Male	29.3
S382	24	C57BL.6	WT	Male	27.6
S382	25	C57BL.6	WT	Male	30.3
S382	26	C57BL.6	WT	Male	30.1
S382	27	C57BL.6	WT	Male	27.8
